# Supplementary material
Source: PubMed Central journal article supplement (PMC4114227)
Supplement: NIHMS519121-supplement-Figure_1.pdf [file NIHMS519121-supplement-Figure_1.pdf]

Figure S1.

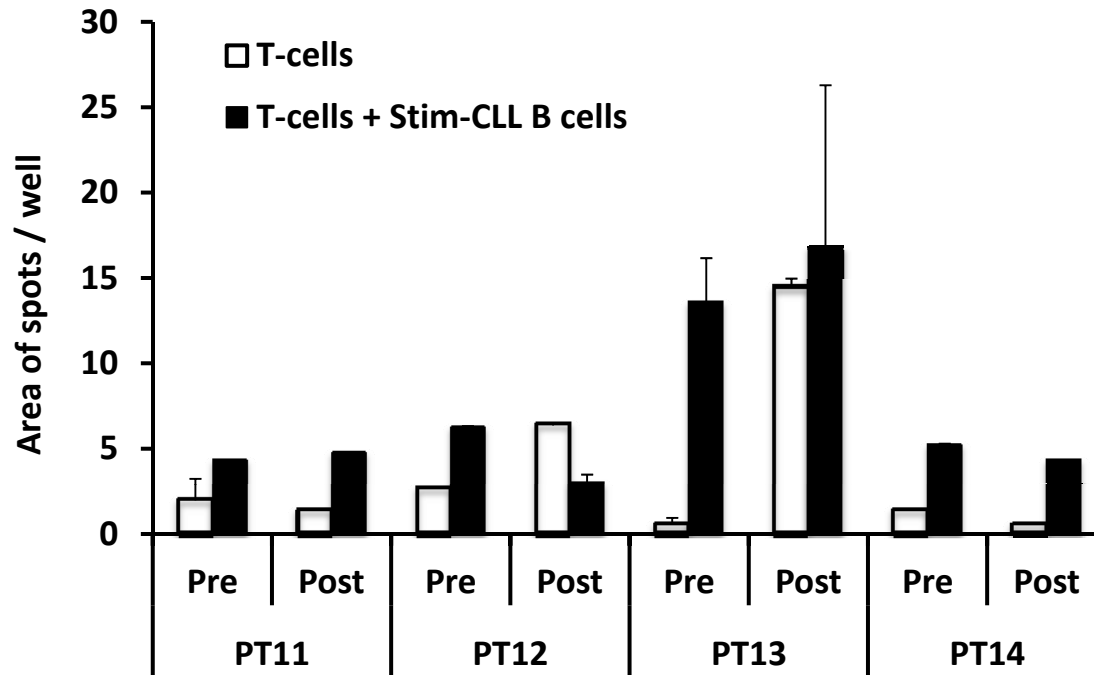

**IFN $\gamma$  ELISPOT assay performed before and after Ad-ISF35 IDI.** Purified T cells from peripheral blood cells collected before and after Ad-ISF35 IDI were incubated for 48h alone (T-cells) or with autologous CLL cells that were previously stimulated with HeLa-CD154 cells (Stim-CLL B cells). Error bars represent the standard deviation.
